# Supplementary material for: Numerical Comparison of Prediction Models for Aerosol Filtration Efficiency Applied on a Hollow-Fiber Membrane Pore Structure
Source: PubMed Central journal article supplement (PMC6027286; doi:10.3390/nano8060447), 2018-06-19
Supplement: nanomaterials-08-00447-s001.pdf [file nanomaterials-08-00447-s001.pdf]

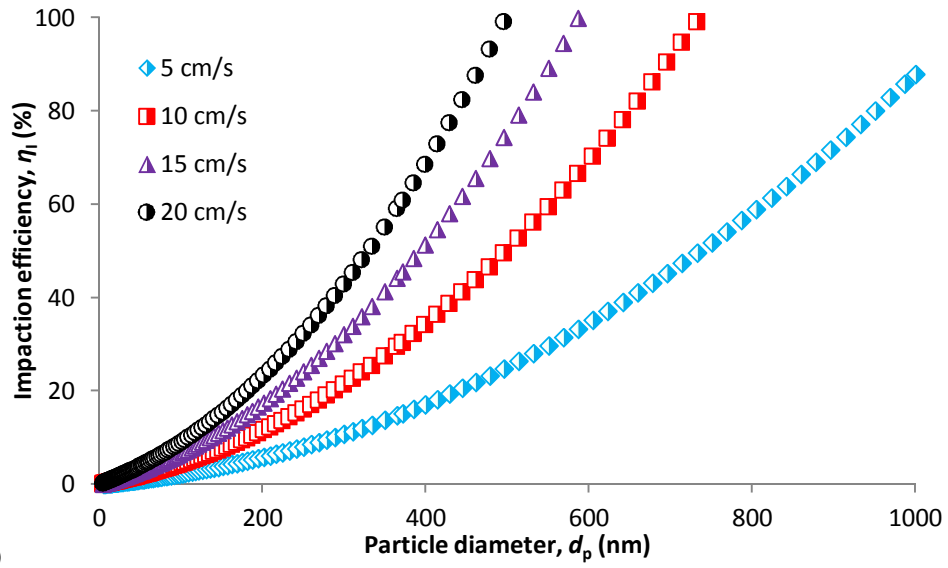

(a)

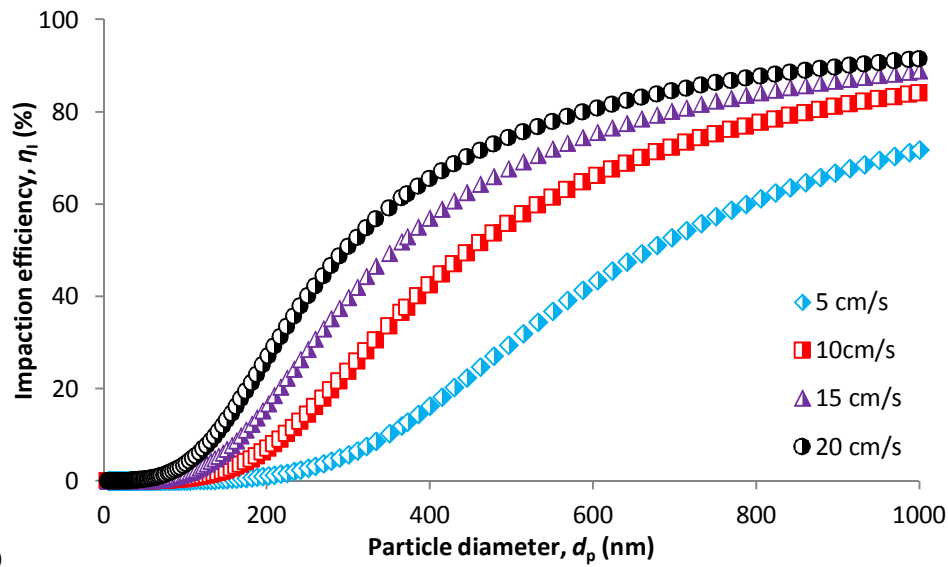

(b)

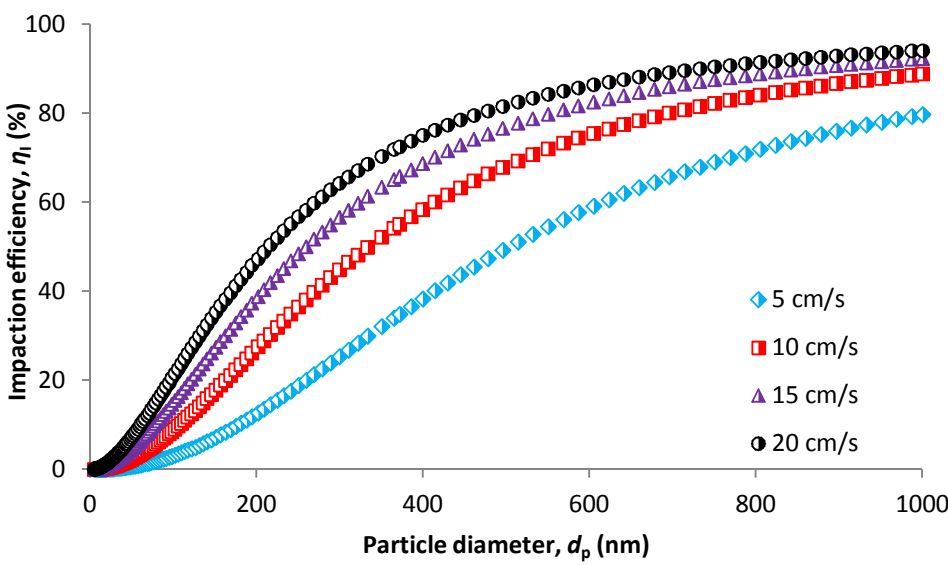

(c)

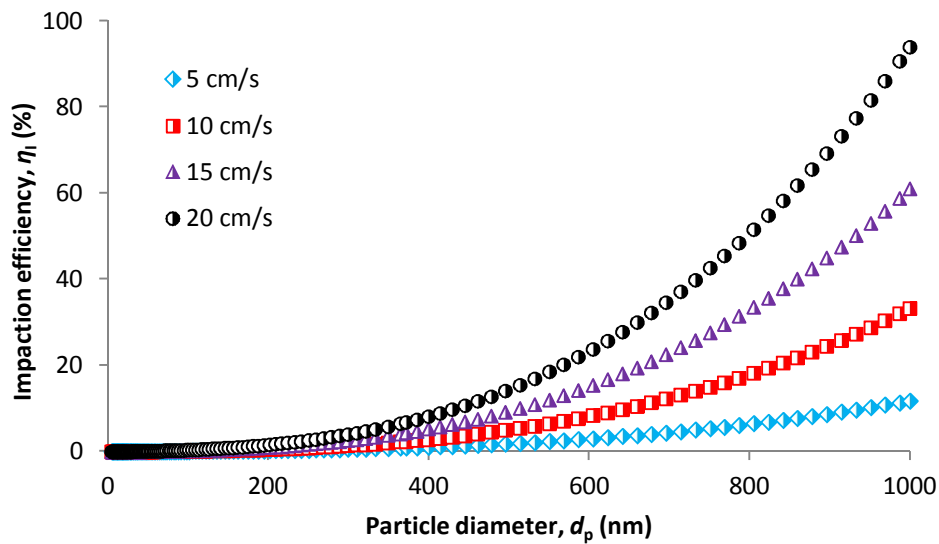

(d)

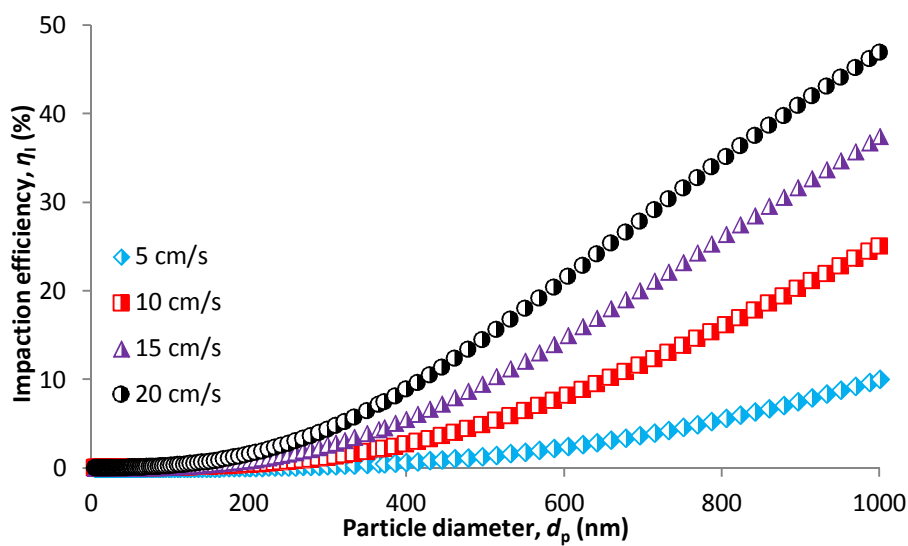

(e)

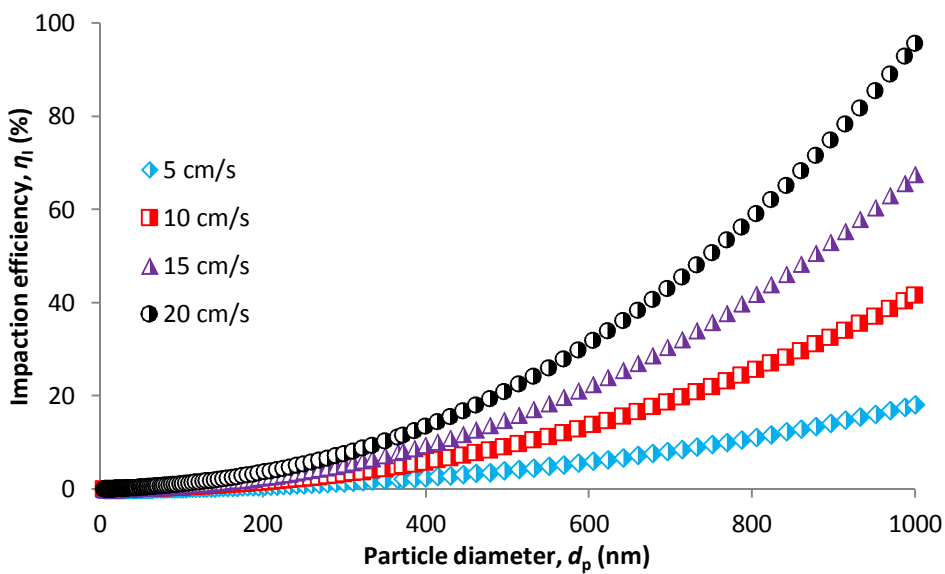

(f)

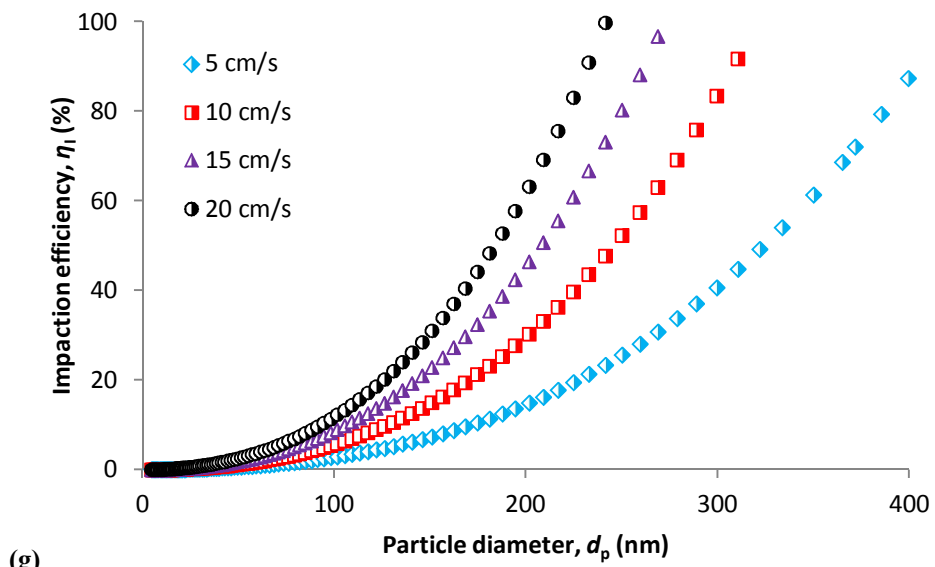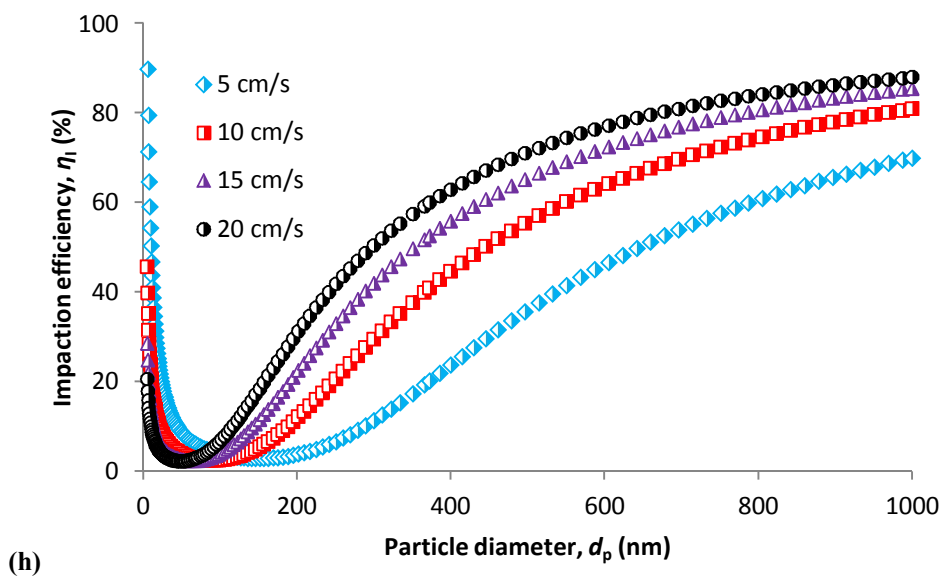

**Figure S1.** SCE due to inertial impaction based on model of Stechkina et al. (a), Landahl and Herman (b), Fuchs (c), Gougeon et al. (d), Suneja and Lee (e), Friedlander (f), Zhu et al. (g) and Illias and Douglas (h)

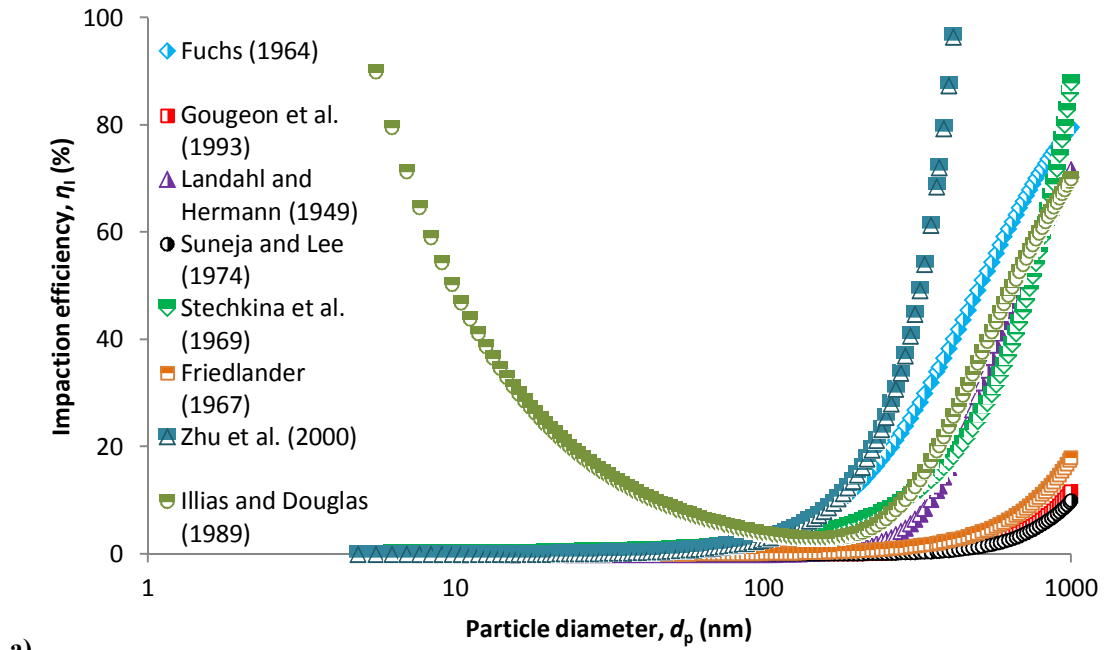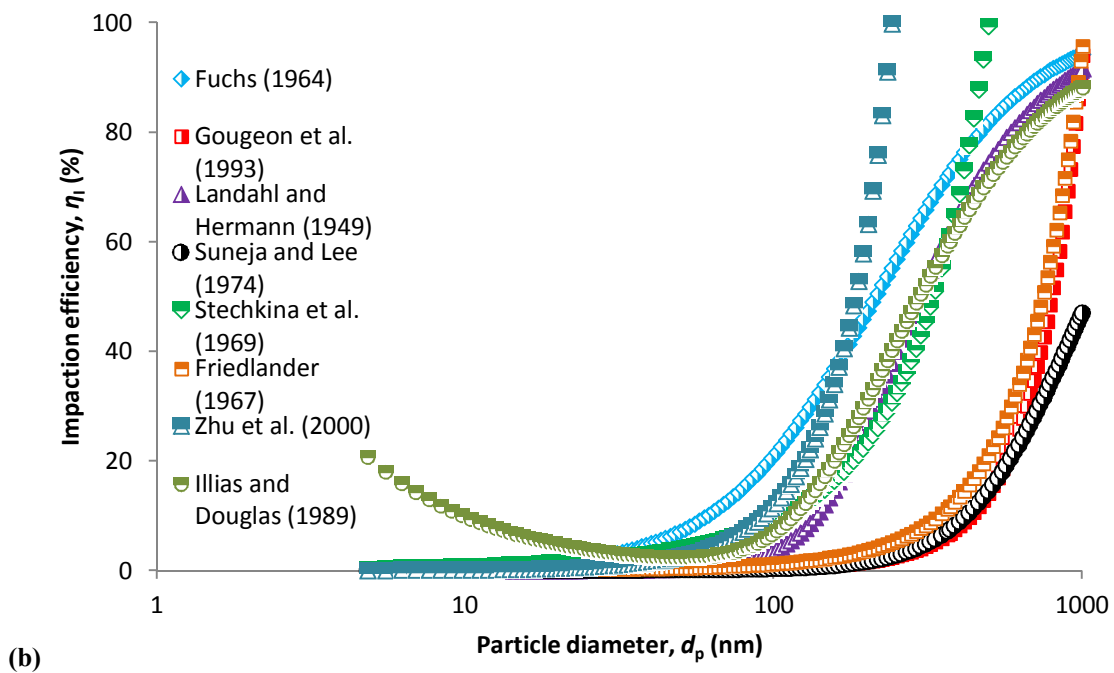

Figure S2. Comparison of impact efficiency based on different models and airflow velocity of 5 cm/s (a) and 20 cm/s (b)

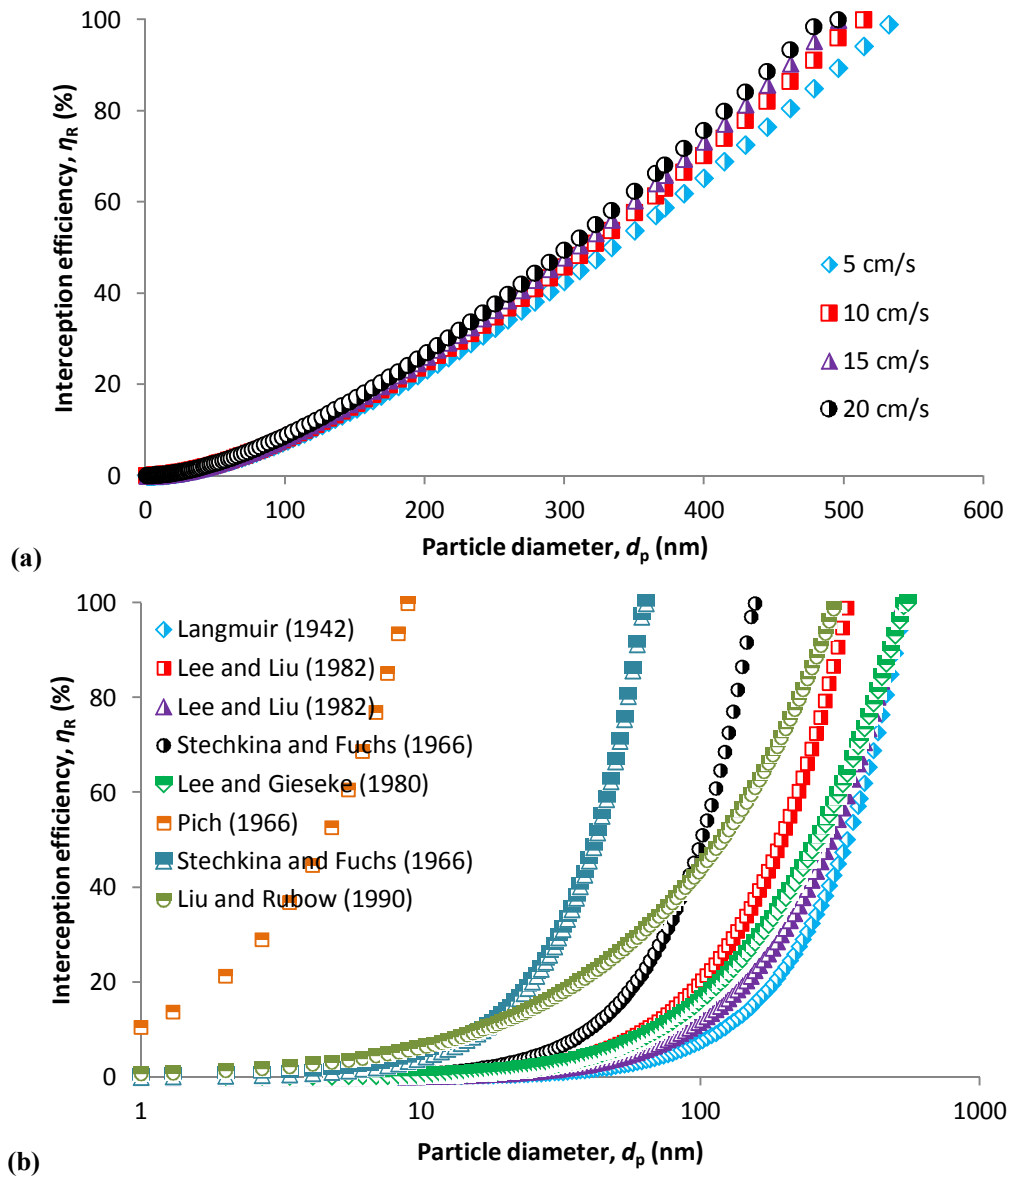

**Figure S3.** Collection efficiency due to interception mechanism based on Langmuir model for different airflow velocities (a) and a comparison of SCE due to interception based on models developed by various researchers (b)

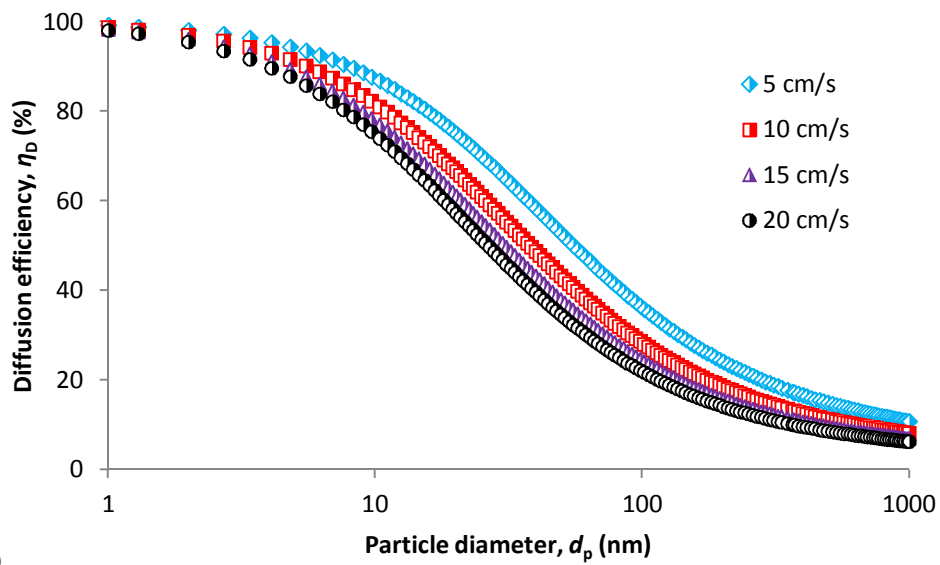

(a)

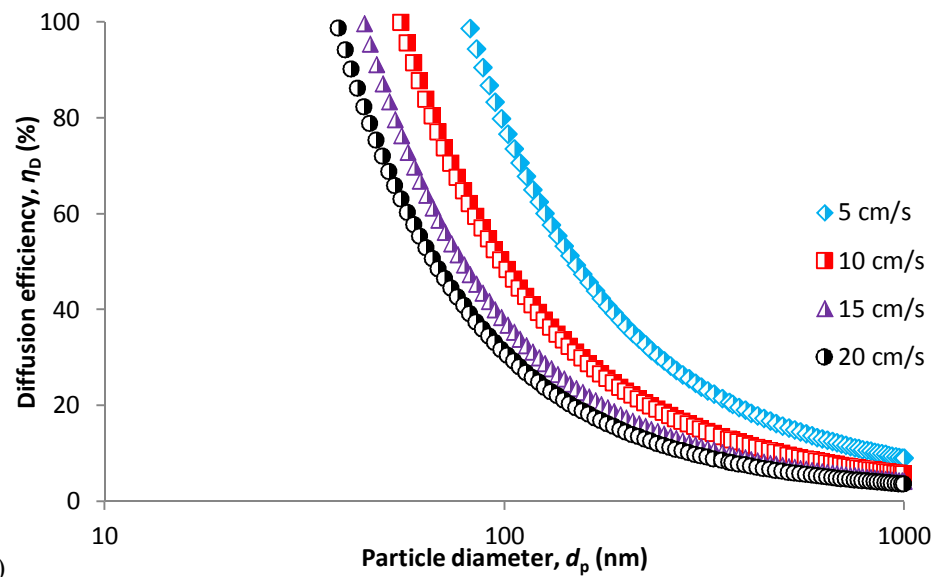

(b)

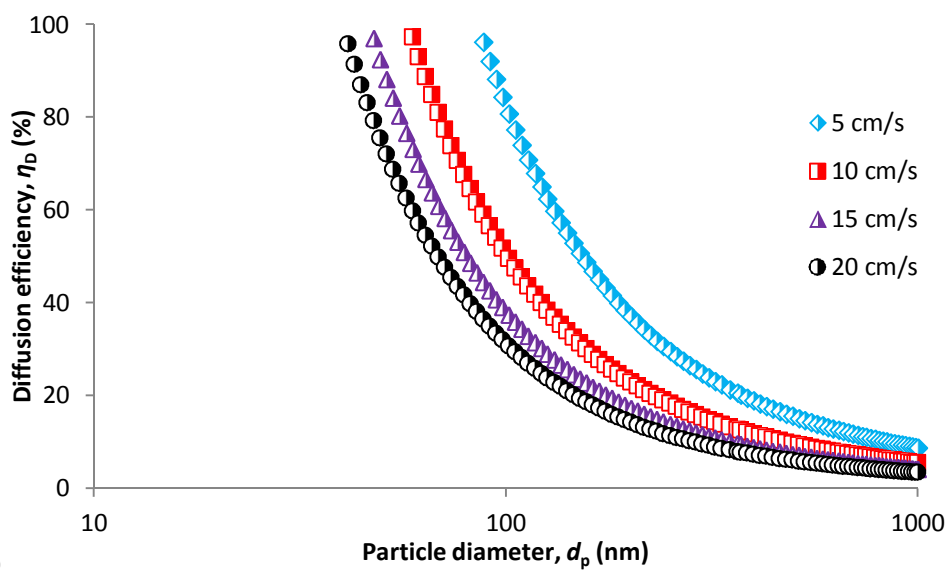

(c)

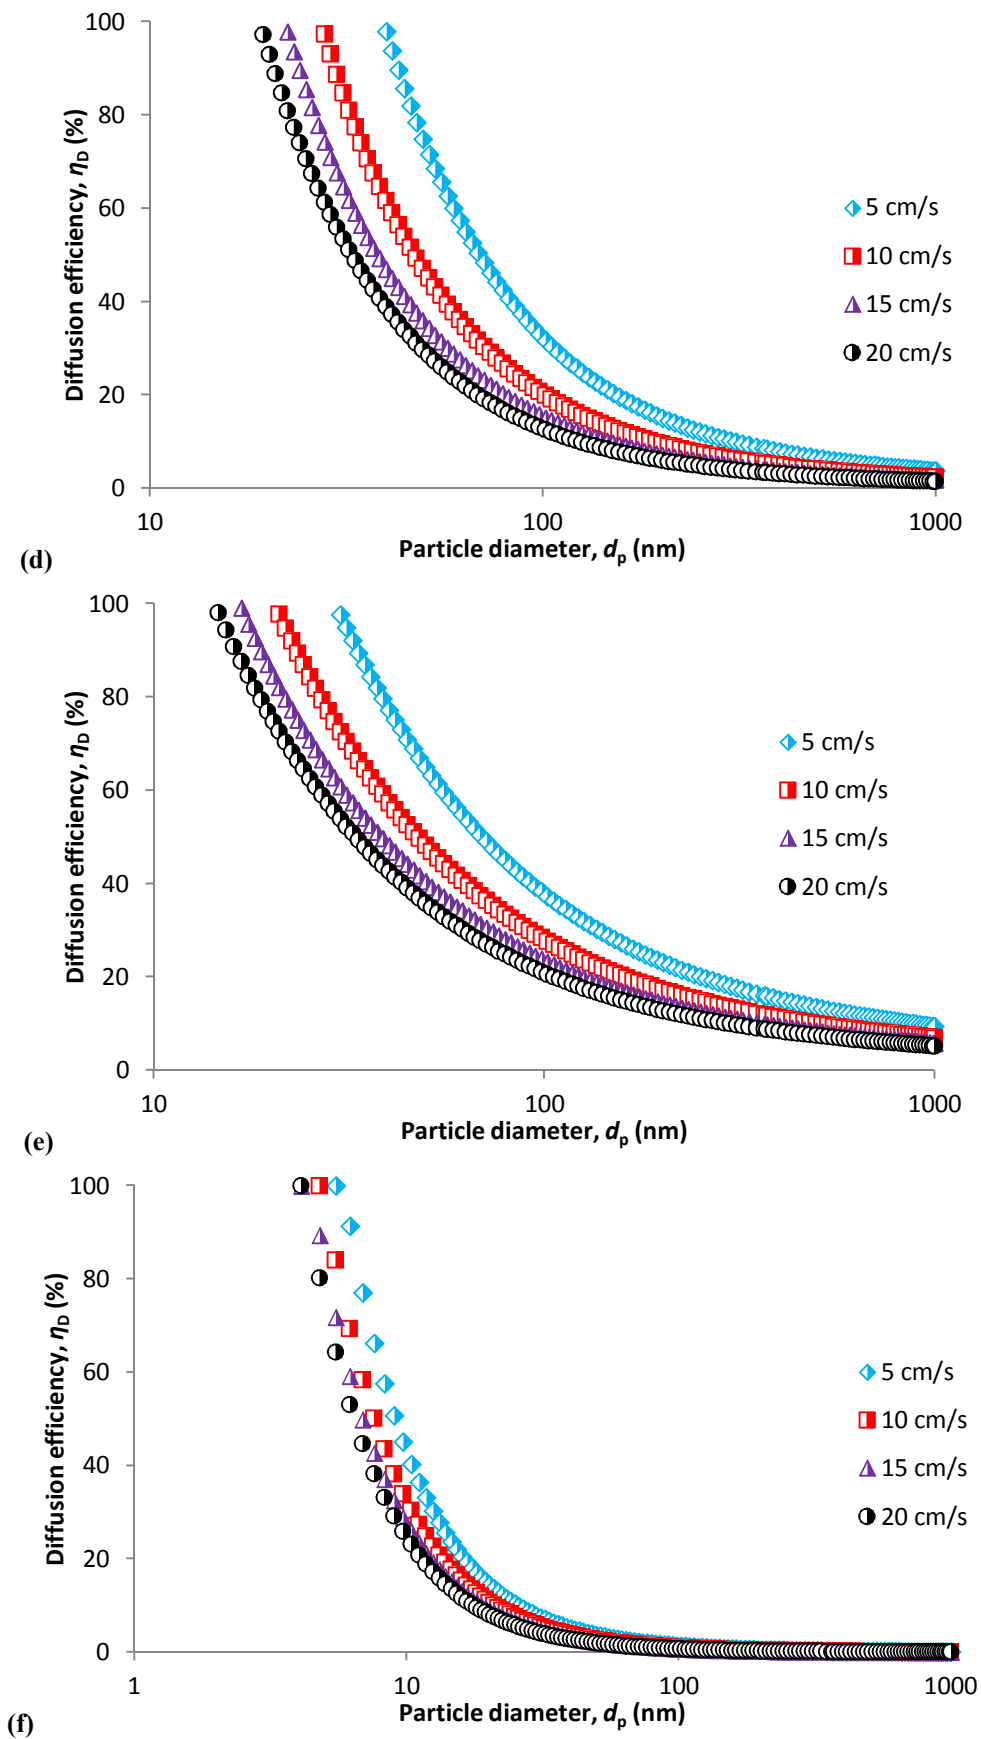

**Figure S4.** SCE due to diffusion mechanism based on mathematical models developed by Payet et al. (a), Kirsch and Fuchs (b), Stechkina et al. (c), Lee and Liu (d), Wang et al. (e) and Pich (f)

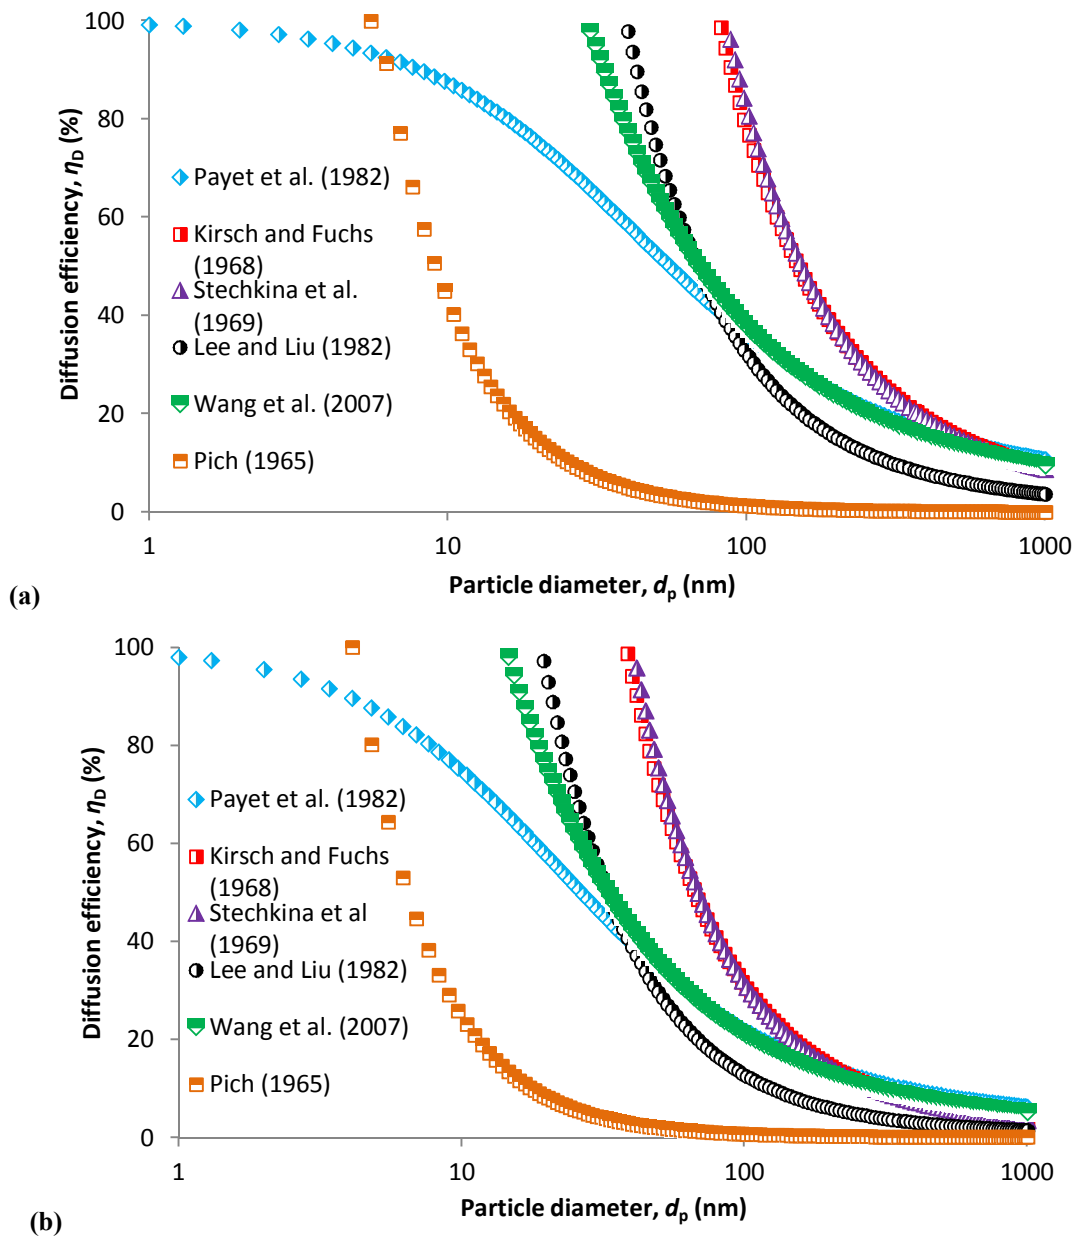

**Figure S5.** Comparison of SCE due to diffusion mechanism based on different models for an airflow velocity of 5 cm/s (a) and 20 cm/s (b)
